# Supplementary material for: Integrating an addiction team into the management of patients transplanted for alcohol-associated liver disease reduces the risk of severe relapse
Source: PubMed Central journal article supplement (PMC10480527; doi:10.1016/j.jhepr.2023.100832), 2023-07-30

## Supplementary materials

### **Integrating an addiction team into the management of patients transplanted for alcohol-associated liver disease reduces the risk of severe relapse**

Jules Daniel, Jérôme Dumortier, Arnaud Del Bello, Lucie Gamon, Nicolas Molinari, Stéphanie Faure, Magdalena Meszaros, José Ursic-Bedoya, Lucy Meunier, Clément Monet, Francis Navarro, Olivier Boillot, Georges-Philippe Pageaux, Hélène Donnadieu-Rigole

Supplementary data:

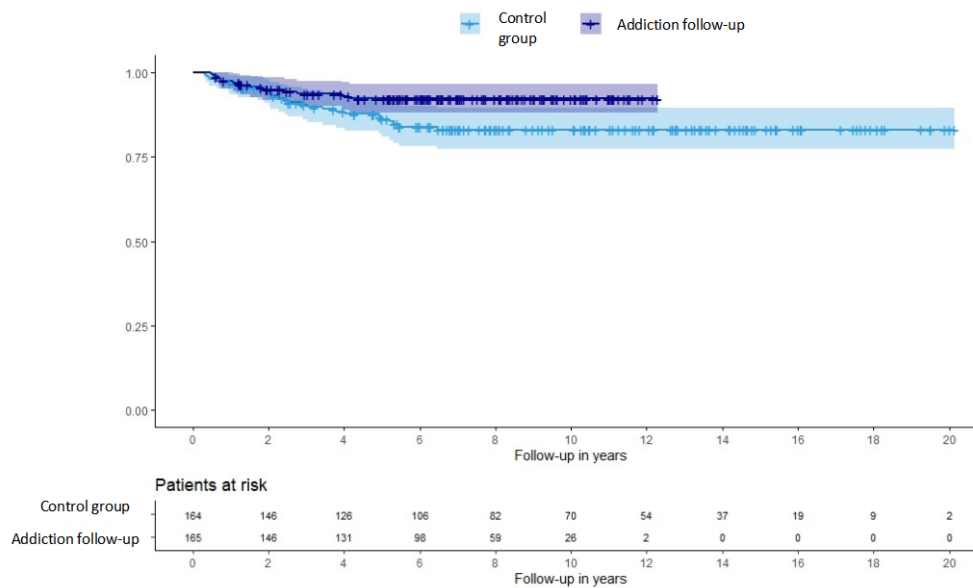

Supplement: mmc1.pdf [file mmc1.pdf]
